# Supplementary material for: Controlled synthesis of porous Co3O4–C hybrid nanosheet arrays and their application in lithium ion batteries
Source: Royal Society of Chemistry journal article supplement (doi:10.1039/c4ra04352a), 2014-01-01
Supplement: c4ra04352a1.pdf [file c4ra04352a1.pdf]

## Supporting Information

### Controlled synthesis of porous Co<sub>3</sub>O<sub>4</sub>-C hybrid nanosheet arrays and their application in lithium ion batteries

5 Jun Wang,<sup>a,b</sup> Bing Gao<sup>a</sup>, Long Zhang<sup>b</sup>, Rui Li<sup>b</sup>, Jinpeng Shen<sup>b</sup>, Zhiqiang Qiao<sup>a</sup>, Guangcheng Yang<sup>\*a,b</sup> and Fude Nie<sup>a</sup>

Received (in XXX, XXX) Xth XXXXXXXXX 20XX, Accepted Xth XXXXXXXXX 20XX

DOI: 10.1039/b000000x

<sup>a</sup> Institute of Chemical Materials, China Academy of Engineering Physics, Mianyang, 621900, Sichuan, China

10

<sup>b</sup> Sichuan New Material Research Center, Mianyang, 621000, China

The formation of Co<sub>3</sub>O<sub>4</sub> nanosheets (NS) is also verified by the FTIR result, as shown in Figure S1. In precursor, strong absorptions are observed in the 2850-2950 cm<sup>-1</sup> range, corresponding to C-H bands, and at 1050-1125 cm<sup>-1</sup>, corresponding to (CH<sub>2</sub>), (C-O) bands. The precursor contains stretching vibrations bands of Co-O (519 cm<sup>-1</sup>) and Co-OH (973 cm<sup>-1</sup>). The band at 1624 cm<sup>-1</sup> corresponds to the angular deformation of molecular water. After annealing at 450 °C for 2 h in N<sub>2</sub> flow, the bands of the precursor disappeared and two  
15 very strong peaks centered at 576 cm<sup>-1</sup> and 672 cm<sup>-1</sup> characteristic of spinel Co<sub>3</sub>O<sub>4</sub>. For both FTIR curves of the precursor and the obtained Co<sub>3</sub>O<sub>4</sub>, the broad band between 3440 cm<sup>-1</sup> and 3500 cm<sup>-1</sup>, could be assigned to the OH stretching and bending modes of water and surface hydroxyl groups.

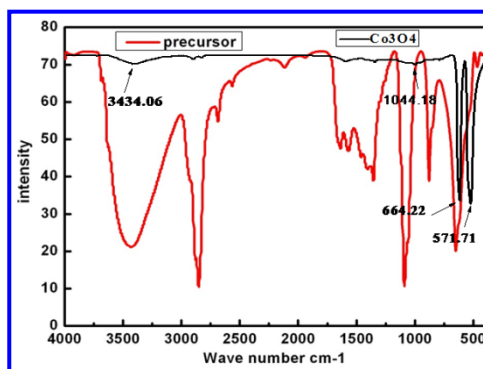

Figure S1. The FTIR spectra of the precursor and the products after annealing

20

The Raman spectrum of the products measured at room temperature in Figure S2 displays four Raman peaks located at around 476, 525, 622, and 692 cm<sup>-1</sup>, respectively corresponding to the Eg, F2g, F2g, and A1g modes of the spinel Co<sub>3</sub>O<sub>4</sub> phase. The Raman spectrum further demonstrates that the as-synthesized product is cobalt oxide.

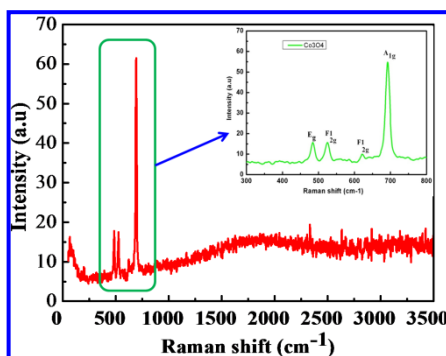

Figure S2. Raman spectrum of the products after annealing

It is important to control carbon content for improving electrochemical properties of electrode materials for lithium-ion batteries, because the carbon would provide a flexible buffer to accommodate the volume change during lithium insertion/extraction and increase the conductivity of the electrode. In this work, the carbon content of  $\text{Co}_3\text{O}_4\text{-C}$  NS can be controllable synthesized through controlling PVP content in the precursors and the conditions of the annealing. As shown in Figure. S3(a)-(c), the carbon content ranges from 21.30 % to 5.30 % with PVP concentration decreases from 0.8 to 0.5 g and the time of annealing increases from 2 to 4h.

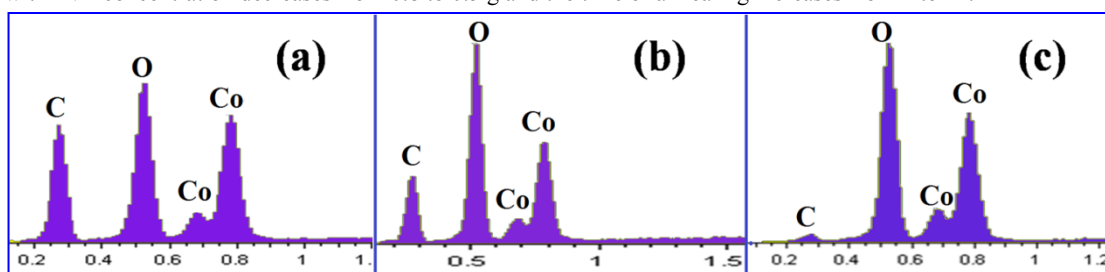

Figure S3 EDX elemental intensity of the NS arrays with different carbon content

10

## Electrochemical capacities:

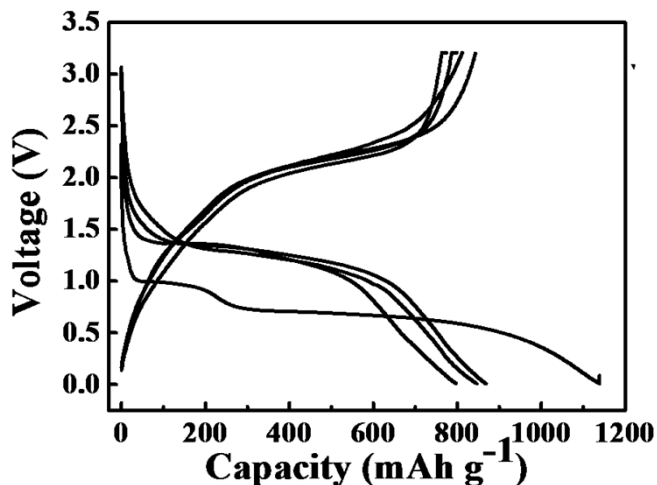

Figure. 4S the charge-discharge curves of  $\text{Co}_3\text{O}_4\text{-C}$  NS arrays for different cycles, the carbon content of the  $\text{Co}_3\text{O}_4\text{-C}$  NS is 16.5% and the mass of the electrode material is 2.94mg.

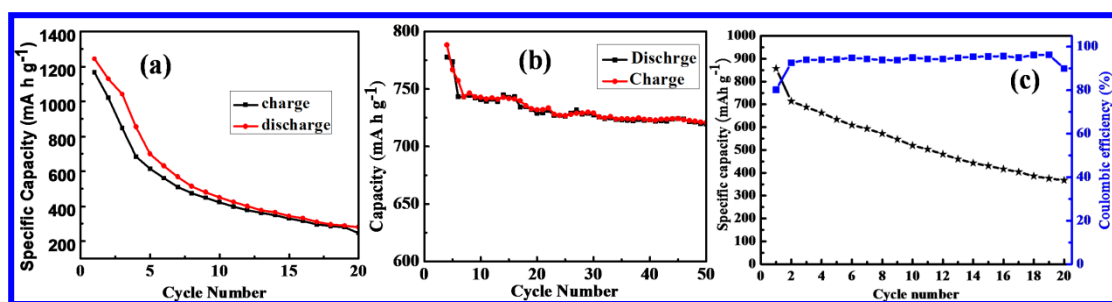

Figure. 5S (a): Figure. 5S (a): The capacity of the commercial  $\text{Co}_3\text{O}_4$  sample.(b): The capacity of  $\text{Co}_3\text{O}_4$ -C nanosheet array. (c) The capacity of  $\text{Co}_3\text{O}_4$ /C nanocomposites.

Figure.5S(a) shows the cycling performance of the commercial  $\text{Co}_3\text{O}_4$  sample between 0.1 and 3.2 V at 0.2 C. The  $\text{Co}_3\text{O}_4$  nanoparticles fades quickly, retains only  $280 \text{ mA h g}^{-1}$  after 20 cycles. The commercial  $\text{Co}_3\text{O}_4$  nanoparticles deliver an initial discharge capacity of  $1124 \text{ mA h g}^{-1}$  and exhibit a poor capacity retention with obvious capacity fading.

Figure. 5S(b) shows the charge specific capacity and the columbic efficiency with cycling at a current rate of C/2. It is evident that  $\text{Co}_3\text{O}_4$ -C nanosheet array shows much good cycling performance. The capacity of  $\text{Co}_3\text{O}_4$ -C nanosheet array remain as high as  $720 \text{ mA h g}^{-1}$  after 50 cycles, and the corresponding fading rate is 1.2% per cycle. The results reveal that  $\text{Co}_3\text{O}_4$ -C nanosheet array is really helpful for construction of  $\text{Co}_3\text{O}_4$  anode materials with high LIB performance.

Figure. 5S(c) shows the cycling performance of the  $\text{Co}_3\text{O}_4$ /carbon nanocomposites. The  $\text{Co}_3\text{O}_4$ /carbon fades quickly, retains only  $430 \text{ mA h g}^{-1}$  after 20 cycles. The  $\text{Co}_3\text{O}_4$ /carbon deliver an initial discharge capacity of  $860 \text{ mA h g}^{-1}$  and exhibit a poor capacity retention compared with  $\text{Co}_3\text{O}_4$ -C nanosheet array.

15

**Table S1. List of lithium battery performance of  $\text{Co}_3\text{O}_4$  from different references.**

| Reference                                           | Nanostructure                                             | Capacitance performance                            | Description of the method                                                                                                                                      |
|-----------------------------------------------------|-----------------------------------------------------------|----------------------------------------------------|----------------------------------------------------------------------------------------------------------------------------------------------------------------|
| Adv. Funt. Mater., 2012. 20. 1680-1686              | $\text{Co}_3\text{O}_4$ hollow spheres                    | $700 \text{ mAh g}^{-1}$ at 30 <sup>th</sup> cycle | Hydrothermal treatment followed by calcination process.                                                                                                        |
| Mate. Lett., 91 (2013) 291-293                      | $\text{Co}_3\text{O}_4$ nanoparticles                     | $652 \text{ mAh g}^{-1}$ at 50 <sup>th</sup> cycle | Cobalt nitrate hexahydrate and PVP were mixed and then heated to high temperature for 24h.                                                                     |
| Solid State Sciences 14 (2012) 451-455              | chrysanthemum-like $\text{Co}_3\text{O}_4$ architectures  | $380 \text{ mAh g}^{-1}$ at 20 <sup>th</sup> cycle | Hydrothermal route and a subsequent calcination process.                                                                                                       |
| Journal of Solid State Chemistry 183 (2010) 600-605 | flower-like $\text{Co}_3\text{O}_4$                       | $150 \text{ mAh g}^{-1}$ at 20 <sup>th</sup> cycle | Cobalt nitrate hexahydrate, sodium hydroxide and succinic acid mixed and then heated to high temperature.                                                      |
| Chem. Commun., 2011.47.3469-3471                    | foam-like freestanding $\text{Co}_3\text{O}_4$ nanosheets | $750 \text{ mAh g}^{-1}$ at 20 <sup>th</sup> cycle | Co to grow a $\text{Co}(\text{OH})_2$ , followed by thermal treatment to form mesoporous $\text{Co}_3\text{O}_4$ .                                             |
| Chem. Commun., 2011.47.12280-12282                  | $\text{Co}_3\text{O}_4$ self-stacked nanosheets           | $920 \text{ mAh g}^{-1}$ at 40 <sup>th</sup> cycle | Self-stacked $\text{Co}_3\text{O}_4$ nanosheets were obtained by a solvothermal method in the presence of (PVP) and water followed by a calcination treatment. |
| J. Mater. Chem., 2011.21.17998-18002                | $\text{Co}_3\text{O}_4$ -C core-shell sphere              | $720 \text{ mAh g}^{-1}$ at 40 <sup>th</sup> cycle | Cobalt(II) acetate tetrahydrate and sodium citrate were added to ethylene glycol (EG) followed by hydrothermal treatment, Finally, calcination treatment.      |

Table S1 shows a complete table of comparison about the capacitance performance in the literatures. As shown in Table S1, the reported capacitance performance is varied from 150 to 920  $\text{mAh g}^{-1}$ , with a common value of  $\sim 700 \text{ mAh g}^{-1}$ , which is a little lower than

our capacitance performance of 720 mAh g<sup>-1</sup>. However, Costly equipment and multisteps increase the cost and are time consuming, which significantly hinders the process scale-up. Therefore, more efforts should still be focused on controlling synthesis of Co<sub>3</sub>O<sub>4</sub> nanostructures on the substrate in a convenient way. And it should be pointed out that in this manuscript, besides the capacitance performance of Co<sub>3</sub>O<sub>4</sub>, we more focused on developing a universal strategy for controlled synthesis of porous metal oxide and carbon hybrid nanosheet arrays directly on various substrates, especially on the conductive flexible subtracts, which is rarely reported and shows the originality of our work. And our results demonstrated that the proposed method is very convenient for direct growth porous metal oxides and carbon hybrid nanosheet arrays on conductive flexible subtract such as carbon cloth, which is promising for the flexible electronics technology of energy storage devices. Other metal oxides which can achieve much higher lithium battery performance or good for other applications will be the further studied with this method in the future.
